# Supplementary material for: Developing core economic parameter sets for asthma studies: a realist review and an analytical framework
Source: HighWire-hosted journal article supplement (doi:10.1136/bmjopen-2020-037889), 2020-10-01
Supplement: bmjopen-2020-037889supp003_data_supplement.pdf [file bmjopen-2020-037889supp003_data_supplement.pdf]

**Appendix 3.** Keywords used for searching economic parameters.

| <b>Category</b>      | <b>Keywords</b>                                                                                                                 |
|----------------------|---------------------------------------------------------------------------------------------------------------------------------|
| Primary care         | primary, GP, physician, nurse, specialist, home, telephone, physio, ambulatory, acupuncture, psychologist, unscheduled (visits) |
| Secondary care       | hospital, outpatient, inpatient, clinic                                                                                         |
| Emergency care       | A&E, emergency, ambulance, intensive, ICU, out-of-hours                                                                         |
| Medication           | medication, drug, adherence                                                                                                     |
| Diagnostics          | diagnostic, test                                                                                                                |
| Work                 | work, productivity (loss), disability, retirement, absenteeism, presenteeism, earnings                                          |
| School               | school, nursery                                                                                                                 |
| Informal care        | informal (care), parent, caregiver, carer, child care, family (help, care), house (help, worker)                                |
| Health care delivery | travel, waiting, supplies, education, admin, willingness (to pay), personnel, bedding, (home) improvements                      |
| Devices              | device, inhaler, nebuliser                                                                                                      |
| Health utility       | QALY (quality-adjusted life years), HR-QoL (health-related quality of life), YLD (years lived with disability)                  |
