# Supplementary material for: Developing core economic parameter sets for asthma studies: a realist review and an analytical framework
Source: HighWire-hosted journal article supplement (doi:10.1136/bmjopen-2020-037889), 2020-10-01
Supplement: bmjopen-2020-037889supp005_data_supplement.pdf [file bmjopen-2020-037889supp005_data_supplement.pdf]

**Appendix 5.** Ranking of economic parameters with respect to the frequency of their usage in studies with different characteristics (e.g. population, setting, study design). The ranking was based on parameter counts. N represents the number of counts for each resource group.

Some studies used more than one economic parameter from each resource group.

#### Population

| Adults              | N  | Rank |
|---------------------|----|------|
| Secondary care      | 74 | 1    |
| Primary care        | 63 | 2    |
| Medication use      | 59 | 3    |
| Emergency care      | 41 | 4    |
| Work                | 36 | 5    |
| Diagnostics         | 18 | 6    |
| Health utility      | 14 | 7    |
| Healthcare delivery | 9  | 8    |
| Informal care       | 2  | 9    |
| Devices             | 1  | 10   |
| School              | 1  | 11   |

| Children            | N  | Rank |
|---------------------|----|------|
| Secondary care      | 57 | 1    |
| Primary care        | 49 | 2    |
| Medication use      | 40 | 3    |
| Emergency care      | 32 | 4    |
| Work                | 17 | 5    |
| School              | 16 | 6    |
| Diagnostics         | 11 | 7    |
| Healthcare delivery | 11 | 8    |
| Informal care       | 9  | 9    |
| Health utility      | 6  | 10   |
| Devices             | 1  | 11   |

#### Setting

| Primary care        | N   | Rank |
|---------------------|-----|------|
| Secondary care      | 113 | 1    |
| Primary care        | 102 | 2    |
| Medication use      | 87  | 3    |
| Emergency care      | 70  | 4    |
| Work                | 38  | 5    |
| Diagnostics         | 22  | 6    |
| Healthcare delivery | 17  | 7    |
| Health utility      | 14  | 8    |
| School              | 13  | 9    |
| Informal care       | 8   | 10   |

|         |   |    |
|---------|---|----|
| Devices | 5 | 11 |
|---------|---|----|

| Secondary care      | N  | Rank |
|---------------------|----|------|
| Secondary care      | 68 | 1    |
| Primary care        | 49 | 2    |
| Medication use      | 41 | 3    |
| Emergency care      | 33 | 4    |
| Work                | 30 | 5    |
| Diagnostics         | 12 | 6    |
| Health utility      | 11 | 7    |
| Healthcare delivery | 10 | 8    |
| Informal care       | 6  | 9    |
| School              | 5  | 10   |
| Devices             | 0  | 11   |

#### Study design

| RCT                 | N   | Rank |
|---------------------|-----|------|
| Primary care        | 106 | 1    |
| Secondary care      | 81  | 2    |
| Medication use      | 66  | 3    |
| Emergency care      | 60  | 4    |
| Work                | 34  | 5    |
| Diagnostics         | 12  | 6    |
| School              | 9   | 7    |
| Health utility      | 9   | 8    |
| Informal care       | 8   | 9    |
| Healthcare delivery | 7   | 10   |
| Devices             | 1   | 11   |

| Cohort study        | N  | Rank |
|---------------------|----|------|
| Secondary care      | 92 | 1    |
| Medication use      | 66 | 2    |
| Primary care        | 55 | 3    |
| Emergency care      | 48 | 4    |
| Work                | 36 | 5    |
| Diagnostics         | 16 | 6    |
| School              | 12 | 7    |
| Informal care       | 12 | 8    |
| Healthcare delivery | 11 | 9    |
| Health utility      | 4  | 10   |
| Devices             | 0  | 11   |

| Model          | N  | Rank |
|----------------|----|------|
| Secondary care | 55 | 1    |
| Medication use | 42 | 2    |

|                     |    |    |
|---------------------|----|----|
| Primary care        | 42 | 3  |
| Emergency care      | 33 | 4  |
| Health utility      | 23 | 5  |
| Work                | 18 | 6  |
| Diagnostics         | 14 | 7  |
| Healthcare delivery | 11 | 8  |
| Informal care       | 5  | 9  |
| School              | 3  | 10 |
| Devices             | 0  | 11 |

**Asthma severity**

| <b>Mild</b>         | <b>N</b> | <b>Rank</b> |
|---------------------|----------|-------------|
| Secondary care      | 44       | 1           |
| Medication use      | 38       | 2           |
| Primary care        | 38       | 3           |
| Emergency care      | 31       | 4           |
| Work                | 19       | 5           |
| Diagnostics         | 13       | 6           |
| School              | 7        | 7           |
| Health utility      | 7        | 8           |
| Healthcare delivery | 7        | 9           |
| Informal care       | 5        | 10          |
| Devices             | 2        | 11          |

| <b>Moderate</b>     | <b>N</b> | <b>Rank</b> |
|---------------------|----------|-------------|
| Secondary care      | 57       | 1           |
| Primary care        | 49       | 2           |
| Medication use      | 48       | 3           |
| Emergency care      | 39       | 4           |
| Work                | 28       | 5           |
| Diagnostics         | 14       | 6           |
| Health utility      | 10       | 7           |
| Healthcare delivery | 8        | 8           |
| School              | 7        | 9           |
| Informal care       | 7        | 10          |
| Devices             | 2        | 11          |

| <b>Severe</b>  | <b>N</b> | <b>Rank</b> |
|----------------|----------|-------------|
| Secondary care | 56       | 1           |
| Medication use | 43       | 2           |
| Primary care   | 42       | 3           |
| Emergency care | 37       | 4           |
| Work           | 19       | 5           |
| Diagnostics    | 18       | 6           |
| Health utility | 13       | 7           |

|                     |   |    |
|---------------------|---|----|
| Healthcare delivery | 9 | 8  |
| Informal care       | 7 | 9  |
| School              | 5 | 10 |
| Devices             | 2 | 11 |

**Type of intervention**

| <b>Medication use</b> | <b>N</b> | <b>Rank</b> |
|-----------------------|----------|-------------|
| Primary care          | 117      | 1           |
| Secondary care        | 115      | 2           |
| Medication use        | 98       | 3           |
| Emergency care        | 73       | 4           |
| Work                  | 38       | 5           |
| Health utility        | 27       | 6           |
| Diagnostics           | 18       | 7           |
| Informal care         | 11       | 8           |
| School                | 5        | 9           |
| Healthcare delivery   | 4        | 10          |
| Devices               | 1        | 11          |

| <b>Education</b>    | <b>N</b> | <b>Rank</b> |
|---------------------|----------|-------------|
| Secondary care      | 24       | 1           |
| Emergency care      | 20       | 2           |
| Primary care        | 16       | 3           |
| Work                | 12       | 4           |
| Healthcare delivery | 7        | 5           |
| Diagnostics         | 4        | 6           |
| Medication use      | 3        | 7           |
| School              | 3        | 8           |
| Health utility      | 3        | 9           |
| Devices             | 1        | 10          |
| Informal care       | 0        | 11          |

| <b>Procedures</b>   | <b>N</b> | <b>Rank</b> |
|---------------------|----------|-------------|
| Secondary care      | 31       | 1           |
| Primary care        | 30       | 2           |
| Emergency care      | 20       | 3           |
| Work                | 13       | 4           |
| School              | 9        | 5           |
| Healthcare delivery | 9        | 6           |
| Diagnostics         | 7        | 7           |
| Informal care       | 6        | 8           |
| Health utility      | 5        | 9           |
| Medication use      | 4        | 10          |
| Devices             | 1        | 11          |

| Test                | N | Rank |
|---------------------|---|------|
| Primary care        | 9 | 1    |
| Secondary care      | 7 | 2    |
| Diagnostics         | 5 | 3    |
| Emergency care      | 4 | 4    |
| Healthcare delivery | 4 | 5    |
| Medication use      | 3 | 6    |
| Work                | 3 | 7    |
| Health utility      | 1 | 8    |
| Devices             | 0 | 9    |
| School              | 0 | 10   |
| Informal care       | 0 | 11   |

#### Type of economic analysis

| CA                  | N   | Rank |
|---------------------|-----|------|
| Secondary care      | 109 | 1    |
| Medication use      | 72  | 2    |
| Emergency care      | 71  | 3    |
| Primary care        | 57  | 4    |
| Work                | 48  | 5    |
| School              | 17  | 6    |
| Diagnostics         | 14  | 7    |
| Healthcare delivery | 13  | 8    |
| Informal care       | 11  | 9    |
| Devices             | 2   | 10   |
| Health utility      | 0   | 11   |

| CEA                 | N   | Rank |
|---------------------|-----|------|
| Primary care        | 112 | 1    |
| Secondary care      | 91  | 2    |
| Medication use      | 74  | 3    |
| Emergency care      | 53  | 4    |
| Work                | 34  | 5    |
| Diagnostics         | 19  | 6    |
| Healthcare delivery | 11  | 7    |
| Informal care       | 10  | 8    |
| Health utility      | 10  | 9    |
| School              | 6   | 10   |
| Devices             | 2   | 11   |

| CUA            | N  | Rank |
|----------------|----|------|
| Primary care   | 42 | 1    |
| Secondary care | 39 | 2    |
| Medication use | 35 | 3    |
| Health utility | 33 | 4    |

|                     |    |    |
|---------------------|----|----|
| Emergency care      | 31 | 5  |
| Work                | 16 | 6  |
| Diagnostics         | 12 | 7  |
| Healthcare delivery | 5  | 8  |
| Informal care       | 3  | 9  |
| School              | 2  | 10 |
| Devices             | 1  | 11 |

### Perspective

| Health care provider | N   | Rank |
|----------------------|-----|------|
| Secondary care       | 134 | 1    |
| Primary care         | 131 | 2    |
| Medication use       | 104 | 3    |
| Emergency care       | 93  | 4    |
| Work                 | 46  | 5    |
| Health utility       | 26  | 6    |
| Diagnostics          | 23  | 7    |
| Healthcare delivery  | 17  | 8    |
| Informal care        | 15  | 9    |
| School               | 14  | 10   |
| Devices              | 3   | 11   |

| Societal            | N  | Rank |
|---------------------|----|------|
| Primary care        | 74 | 1    |
| Secondary care      | 66 | 2    |
| Work                | 66 | 3    |
| Medication use      | 54 | 4    |
| Emergency care      | 46 | 5    |
| Informal care       | 17 | 6    |
| School              | 16 | 7    |
| Diagnostics         | 15 | 8    |
| Healthcare delivery | 15 | 9    |
| Health utility      | 12 | 10   |
| Devices             | 1  | 11   |

| Third party payer   | N  | Rank |
|---------------------|----|------|
| Secondary care      | 48 | 1    |
| Medication use      | 30 | 2    |
| Emergency care      | 27 | 3    |
| Primary care        | 20 | 4    |
| Work                | 14 | 5    |
| Diagnostics         | 6  | 6    |
| Health utility      | 3  | 7    |
| Informal care       | 2  | 8    |
| Healthcare delivery | 2  | 9    |

|         |   |    |
|---------|---|----|
| Devices | 1 | 10 |
| School  | 1 | 11 |
